# Supplementary material
Source: PubMed Central journal article supplement (PMC3277228)

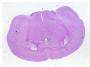

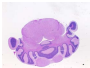

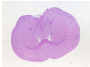

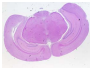

Supplement: mt2011226x1.pdf [file mt2011226x1.pdf]
